# Supplementary material for: Homogeneous vs Biased IGM: Impact on Reionization
Source: Frontiers journal article supplement (doi:10.3389/fspas.2021.633007), 2021-03-29
Supplement: Data_Sheet_1.pdf [file Data_Sheet_1.pdf]

## APPENDIX

In this section, a prescription for the IGM bias parameter will be derived based on the results of the Press-Schechter theory. Let,  $\rho_c$  be the critical density of the universe,  $\Omega_M$  be the matter fraction,  $v$  be the volume of each grid cell,  $\delta$  be the overdensity of a grid cell,  $f_{\text{coll}}$  be the collapse fraction of the grid cell,  $m$  be the mass content of the grid cell. Let us assume that all the haloes with mass greater than  $M_{\text{min}} = 10^8 M_\odot$  are massive and have collapsed to form galaxies. And all the haloes with mass less than  $M_{\text{min}}$  do not form galaxies and hence have baryons that make up the entire IGM. Let  $m_>$  be the total mass in haloes which are more massive than  $M_{\text{min}}$  and  $m_<$  be total mass in haloes which are less massive than  $M_{\text{min}}$ . Let  $\delta_{\text{cmh}}$  be the overdensity measured for the collapsed massive haloes and  $\delta_{\text{lmh}}$  be the overdensity measured for low mass haloes.  $f_{\text{coll}}$  can be obtained exactly in the Press-Schechter framework and is given by

$$f_{\text{coll}} = \text{erfc} \left\{ \frac{\delta_c(z) - \delta_m}{\sqrt{2 [\sigma_{\text{min}}^2 - \sigma^2(m)]}} \right\} \quad (1)$$

Here,  $\delta_m$  is mean linear overdensity of the grid-cell,  $m$  is the total mass in the grid-cell,  $\sigma^2(m)$  is the variance of density fluctuations on the scale  $m$ ,  $\sigma_{\text{min}}^2 = \sigma^2(M_{\text{min}})$ ,  $M_{\text{min}}$  is minimum mass of the ionizing sources and  $\delta_c(z)$  is the critical density for collapse at redshift  $z$ . We have,

$$\begin{aligned} m &= \Omega_M \rho_c v (1 + \delta) \\ m_> &= f_{\text{coll}} m \\ m_< &= m - m_> \end{aligned}$$

Let,  $\bar{m}_>$  and  $\bar{m}_<$  be average values of  $m_>$  and  $m_<$  respectively. We also have,

$$\bar{m}_> = \bar{f}_{\text{coll}} \Omega_M \rho_c v \quad (2)$$

$$\bar{m}_< = (1 - \bar{f}_{\text{coll}}) \Omega_M \rho_c v \quad (3)$$

Where average value of collapse fraction  $\bar{f}_{\text{coll}}$  is given by

$$\bar{f}_{\text{coll}} = \text{erfc} \left\{ \frac{\delta_c(z)}{\sqrt{2 \sigma_{\text{min}}^2}} \right\} \quad (4)$$

Now we have,

$$\delta_{\text{cmh}} = \frac{m_> - \bar{m}_>}{\bar{m}_>} \quad (5)$$

$$= \frac{f_{\text{coll}}(1 + \delta) - \bar{f}_{\text{coll}}}{\bar{f}_{\text{coll}}} \quad (6)$$

$$\delta_{\text{lmh}} = \frac{m_< - \bar{m}_<}{\bar{m}_<} \quad (7)$$

$$= \frac{(1 - f_{\text{coll}})(1 + \delta) - (1 - \bar{f}_{\text{coll}})}{(1 - \bar{f}_{\text{coll}})} \quad (8)$$

Together we have,

$$\alpha \equiv \frac{\delta_{\text{lmh}}}{\delta_{\text{cmh}}} = \frac{(1 + \delta)(1 - f_{\text{coll}}) - (1 - \bar{f}_{\text{coll}})}{(1 + \delta)f_{\text{coll}} - \bar{f}_{\text{coll}}} \times \frac{\bar{f}_{\text{coll}}}{1 - \bar{f}_{\text{coll}}} \quad (9)$$

Both,  $\delta_{\text{cmh}}$  and  $\delta_{\text{lmh}}$ , can be obtained as function of true overdensity  $\delta$  and hence the IGM bias parameter  $\alpha$  can be obtained as a function of overdensity of collapsed massive haloes  $\delta_{\text{cmh}}$ .
